# Supplementary material
Source: Springer Nature journal article supplement (https://www.springermedizin.de/resource/supplementary/12943_2010_682_MOESM4_ESM.pdf/9554568)

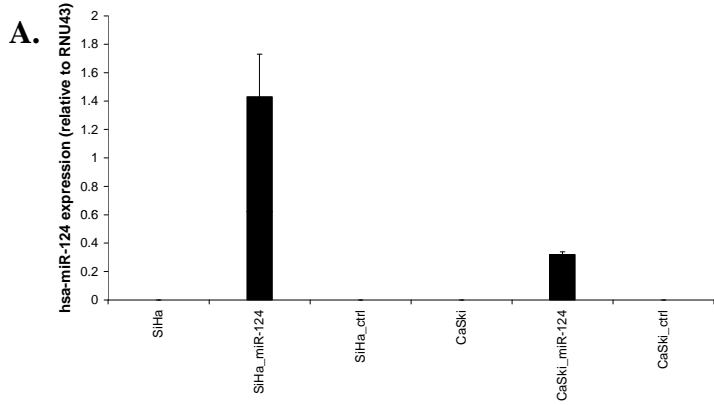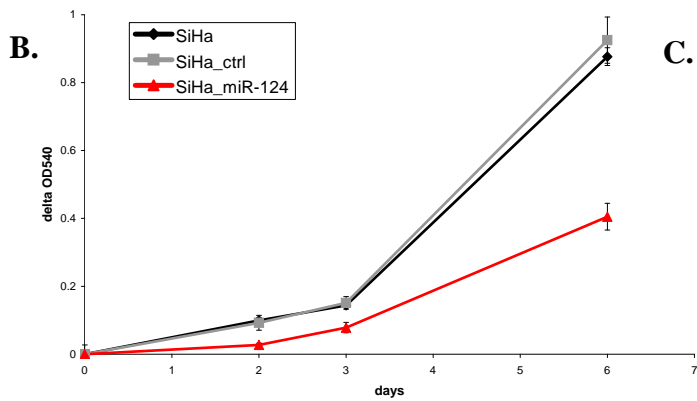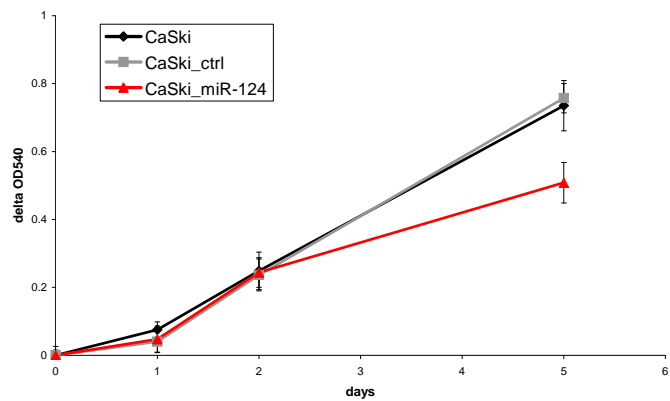

SiHa\_miR-124

SiHa\_ctrl

SiHa

**D.**

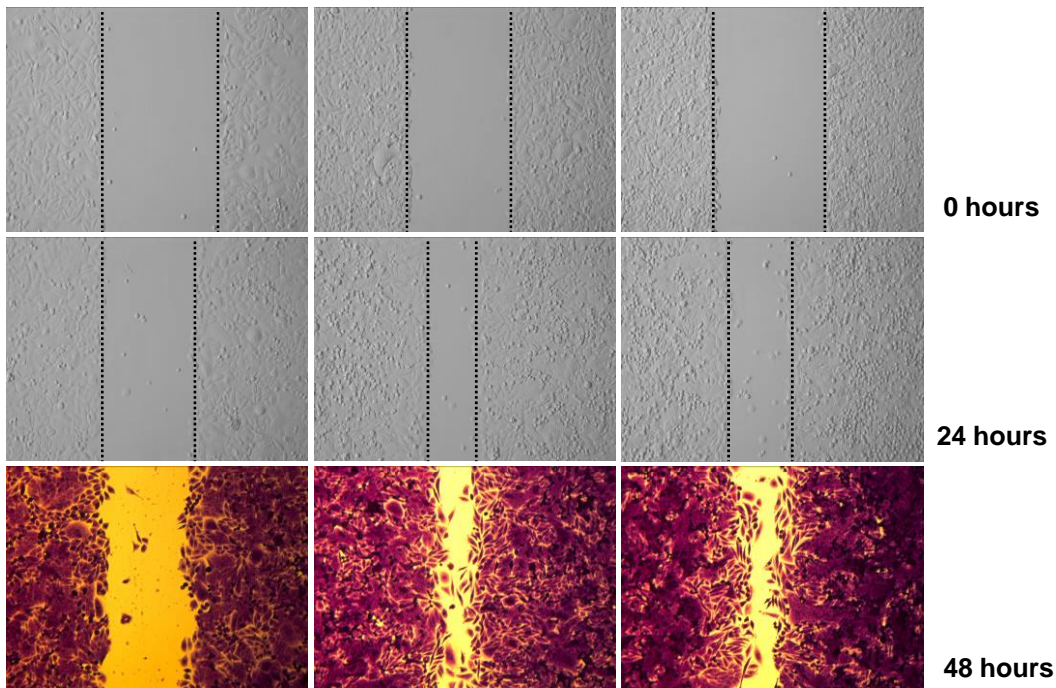

Supplement: MOESM4 [file 9554568]
